# Supplementary material
Source: HighWire-hosted journal article supplement (https://www.cmaj.ca/highwire/filestream/72059/field_highwire_adjunct_files/0/181002-res-1-at.pdf)
Supplement: 181002-res-1-at.pdf [file 181002-res-1-at.pdf]

## Appendix 1 (as submitted by the authors): Supplemental Tables 1 and 2, and Figure 1

**Supplemental Figure 1.** Change in Prenatal Care use between First and Second Pregnancy

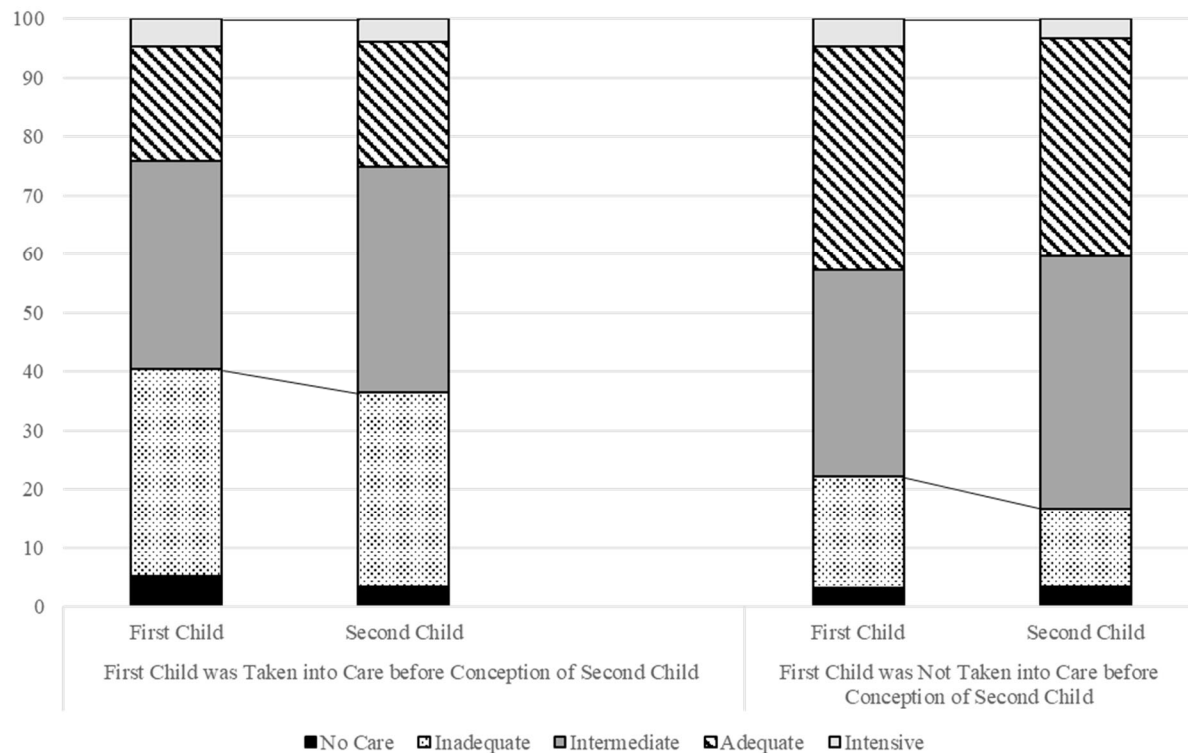

**Supplemental Table 1: Characteristics of the Sub Population (n = 32 840)**

| Covariates                                                         | First Child was Taken<br>into Care before<br>Conception of Second<br>Child (n = 680) | First Child not Taken<br>into Care before Birth of<br>Second Child<br>(n = 32 160) |
|--------------------------------------------------------------------|--------------------------------------------------------------------------------------|------------------------------------------------------------------------------------|
|                                                                    | n (%)                                                                                | n (%)                                                                              |
| <b>During Pregnancy of First Child</b>                             |                                                                                      |                                                                                    |
| Substance Use Diagnosis                                            | 52 (7.7)                                                                             | 265 (0.8)                                                                          |
| <b>Prenatal Care</b>                                               |                                                                                      |                                                                                    |
| Intensive                                                          | 44 (6.5)                                                                             | 1 778 (5.5)                                                                        |
| Adequate                                                           | 156 (22.9)                                                                           | 14 667 (45.6)                                                                      |
| Intermediate                                                       | 269 (39.6)                                                                           | 12 221 (38.0)                                                                      |
| Inadequate                                                         | 178 (26.2)                                                                           | 2 829 (8.8)                                                                        |
| No Care                                                            | 33 (4.9)                                                                             | 665 (2.1)                                                                          |
| <b>At Birth of First Child</b>                                     |                                                                                      |                                                                                    |
| No Social Support                                                  | 14 (2.06)                                                                            | 203 (0.63)                                                                         |
| Less than High School Education                                    | 499 (73.4)                                                                           | 5 248 (16.3)                                                                       |
| Lone Parent                                                        | 446 (65.6)                                                                           | 3 629 (11.3)                                                                       |
| <b>Year</b>                                                        |                                                                                      |                                                                                    |
| 2000-2003                                                          | 168 (24.7)                                                                           | 8 532 (26.5)                                                                       |
| 2004-2009                                                          | 401 (59.0)                                                                           | 17 938 (55.8)                                                                      |
| 2010-2015                                                          | 111 (16.3)                                                                           | 5 690 (17.7)                                                                       |
| Mean Mother's Age (SD)                                             | 19.1 (3.1)                                                                           | 26.4 (5.2)                                                                         |
| Urban Neighborhood                                                 | 489 (71.9)                                                                           | 20 402 (63.4)                                                                      |
| <b>Income Quintile of Neighborhood</b>                             |                                                                                      |                                                                                    |
| 1 (Lowest Income)                                                  | 371 (54.6)                                                                           | 6 199 (19.3)                                                                       |
| 2                                                                  | 133 (19.6)                                                                           | 6 823 (21.2)                                                                       |
| 3                                                                  | 83 (12.2)                                                                            | 6 632 (20.6)                                                                       |
| 4                                                                  | 43 (6.3)                                                                             | 6 648 (20.7)                                                                       |
| 5 (Highest Income)                                                 | 32 (4.7)                                                                             | 5 789 (18.0)                                                                       |
| Missing                                                            | 18 (2.7)                                                                             | 69 (0.2)                                                                           |
| <b>Between Birth of First Child and Conception of Second Child</b> |                                                                                      |                                                                                    |
| Mean Years (SD)                                                    | 3.0 (2.2)                                                                            | 2.3 (1.7)                                                                          |
| Moved                                                              | 469 (69.0)                                                                           | 12 450 (38.7)                                                                      |
| Received Welfare                                                   | 504 (74.1)                                                                           | 4 145 (12.9)                                                                       |
| Diabetes                                                           | 22 (3.2)                                                                             | 484 (1.5)                                                                          |
| Hypertension                                                       | 15 (2.2)                                                                             | 1 301 (4.1)                                                                        |
| Substance Use Diagnosis                                            | 162 (23.8)                                                                           | 770 (2.4)                                                                          |

**Supplemental Table 2: Prenatal Care Utilization for Second Birth (n = 32,840)**

| Level of Prenatal<br>Care Utilization | First Child was<br>Placed in Care before<br>Conception of Second<br>Child (n = 680) | First Child not<br>Placed in Care before<br>Birth of Second Child<br>(n = 32 160) | Model 1                   | Model 2                              | Model 3                              | Model 4                              |
|---------------------------------------|-------------------------------------------------------------------------------------|-----------------------------------------------------------------------------------|---------------------------|--------------------------------------|--------------------------------------|--------------------------------------|
|                                       | n (%)                                                                               | n (%)                                                                             | Unadjusted OR<br>(95% CI) | Adjusted <sup>a</sup> OR<br>(95% CI) | Adjusted <sup>b</sup> OR<br>(95% CI) | Adjusted <sup>c</sup> OR<br>(95% CI) |
| Intensive                             | 29 (4.3)                                                                            | 1 146 (3.6)                                                                       | 1.95 (1.31, 2.91)         | 1.41 (0.93, 2.15)                    | 1.39 (0.91, 2.13)                    | 1.30 (0.84, 2.00)                    |
| Adequate                              | 1 72 (25.3)                                                                         | 13 282 (41.3)                                                                     | 1.00 (Reference)          | 1.00 (Reference)                     | 1.00 (Reference)                     | 1.00 (Reference)                     |
| Intermediate                          | 2 65 (39.0)                                                                         | 14 146 (44.0)                                                                     | 1.45 (1.19, 1.75)         | 1.25 (1.02, 1.53)                    | 1.18 (0.97, 1.45)                    | 1.18 (0.96, 1.45)                    |
| Inadequate                            | 1 89 (27.8)                                                                         | 2 604 (8.1)                                                                       | 5.60 (4.54, 6.92)         | 1.62 (1.28, 2.06)                    | 1.41 (1.11, 1.80)                    | 1.42 (1.11, 1.82)                    |
| No Care                               | 26 (3.7)                                                                            | 982 (3.1)                                                                         | 1.96 (1.28, 3.00)         | 0.78 (0.49, 1.23)                    | 0.95 (0.59, 1.53)                    | 1.07 (0.66, 1.74)                    |

<sup>a</sup> Adjusted for substance use disorder and level of PNC during pregnancy of first child; year, mother's age, neighborhood location and income at birth of first child

<sup>b</sup> Adjusted for substance use disorder and level of PNC during pregnancy of first child; year, mother's age, neighborhood location and income, single parent, social isolation, and education at birth of first child

<sup>c</sup> Adjusted for substance use disorder and level of PNC during pregnancy of first child; year, mother's age, neighborhood location and income, single parent, social isolation, and education at birth of first child; number of years, residential mobility, EIA receipt, hypertension, diabetes, and substance use disorder diagnosis between birth of first child and conception of second child
